# Supplementary material for: Monodispersed flower-like MXene@VO2 clusters for aqueous zinc ion batteries with superior rate performance
Source: Royal Society of Chemistry journal article supplement (doi:10.1039/d2nr03012h), 2022-01-01
Supplement: d2nr03012h1.pdf [file d2nr03012h1.pdf]

## Supporting Information

# Monodispersed flower-like MXene@VO<sub>2</sub> clusters for aqueous zinc ion battery with superior rate performance

Zhibin Xu,<sup>a</sup> Xilong Li,<sup>a</sup> Yueang Jin,<sup>a</sup> Qi Dong,<sup>a</sup> Jiajia Ye,<sup>a</sup> Xueqian  
Zhang<sup>\*b</sup> and Yitai Qian<sup>\*a</sup>

<sup>a</sup>School of Chemistry and Material Science, University of Science and  
Technology of China, Hefei 230026, China

<sup>b</sup>School of Physics and Materials Engineering, Hefei Normal University,  
Hefei 230621, China.

## 1. Experimental Section

*Synthesis of  $Ti_3C_2T_x$  MXene nanosheets:*  $Ti_3C_2T_x$  MXene nanosheets were prepared as previously reported. Briefly, 5 g  $Ti_3AlC_2$  MAX particles were added into a 100 mL hydrochloric acid (HCl, 12 M) solution containing 5 g lithium fluoride (LiF) and the suspension was stirred at 40 °C for around 45 h. The multi-layered MXene (m-MXene) was collected by centrifugation, which was then washed with deionized water several times until the supernatant was virtually neutral, before freeze-drying. MXene nanosheets were subsequently obtained by ice-water bath ultrasonic process. In detail, 1 g m-MXene was mixed with 100 mL deionized water before being ultrasonically treated for 1 h. MXene nanosheets were produced by centrifuging the suspension of m-MXene at 3500 rpm for 1 h and then freeze-drying the supernatant.

*Preparation of MXene@VO<sub>2</sub> composite:* Firstly, 1.2 g V<sub>2</sub>O<sub>5</sub> and 1.8 g H<sub>2</sub>C<sub>2</sub>O<sub>4</sub>·2H<sub>2</sub>O were dissolved in 40 mL deionized water with continuous stirring at 75 °C for 1 h. Then, a predetermined amount of as-prepared MXene nanosheets (54 mg, 10 wt.%) was added to the fore prepared suspension and stirred until complete dispersion with N<sub>2</sub> purging to eliminate the dissolved O<sub>2</sub> to prevent the oxidation of MXene nanosheets in the subsequent hydrothermal procedure. Afterward, the suspension was sealed into a 50 mL Teflon-lined autoclave and kept in an oven at 180 °C for 3 h. After the autoclave was cooled down to room temperature, the final product was collected by centrifugation, washed multiple times with deionized water, and freeze-dried, named MXene@VO<sub>2</sub>. For comparison, pure VO<sub>2</sub> was synthesized via the same method but without the addition of MXene nanosheets.

*Materials characterization:* The phase compositions of the samples were determined by X-ray diffraction (XRD) using a Philips X' Pert Super diffractometer with Cu K<sub>α</sub> ( $\lambda=1.54$  Å) over a  $2\theta$  range of 10-60°. To observe the microstructures and morphologies of the samples, scanning electron microscopy (SEM, JEOL-JSM-6700F), transmission electron microscopy (TEM, Hitachi H7650) and high-resolution transmission electron microscopy (HRTEM, JEM-2100F) was used, in conjunction

with energy dispersive spectroscopy (EDS) to analyze chemical element composition. The Raman spectrum was acquired by a JYLABRAM-HR Confocal Laser Micro-Raman spectrometer at 532 nm. The X-ray photoelectron spectroscopy (XPS) results were collected on a Perkin-Elmer ESCALAB 250 X-ray photoelectron spectrometer to analyze the chemical structures and elemental valence states. The surface areas of the samples were obtained by a physisorption analyzer (ASAP-2020) based on N<sub>2</sub> adsorption-desorption.

*Electrochemical measurements:* To measure the electrochemical performances of the samples, the CR2032 coin cells were fabricated, which included the cathode, anode (100  $\mu\text{m}$ , zinc foil), electrolyte (200  $\mu\text{L}$ , 2 M ZnOTf) and separator (GF/D glass fiber membrane). Therein, the cathode was prepared by uniformly mixing the active materials (VO<sub>2</sub>, MXene@VO<sub>2</sub>), super P, and PVDF in a mass ratio of 70%:20%:10% and then mixing with *N*-methyl-2-pyrrolidone (NMP), after which the slurry was coated on the current collector (titanium mesh) followed with drying in a vacuum oven. The mass load of the active materials is about 3.0 mg cm<sup>-2</sup> on each electrode. The cyclic voltammetry (CV) and electrochemical impedance spectroscopy (EIS) were tested on an electrochemical workstation (CHI660E). The galvanostatic charge/discharge (GCD) tests were conducted by battery testing systems (LAND CT3001A) to acquire the cycle and rate performances of the samples. The self-charging battery is prepared through similar assembling procedure of 2032 cells with the MXene@VO<sub>2</sub> composite as the cathode, 2 M ZnOTf as the electrolyte and Zn metal plate as the anode. What is different is that the cathode is exposed to the air.

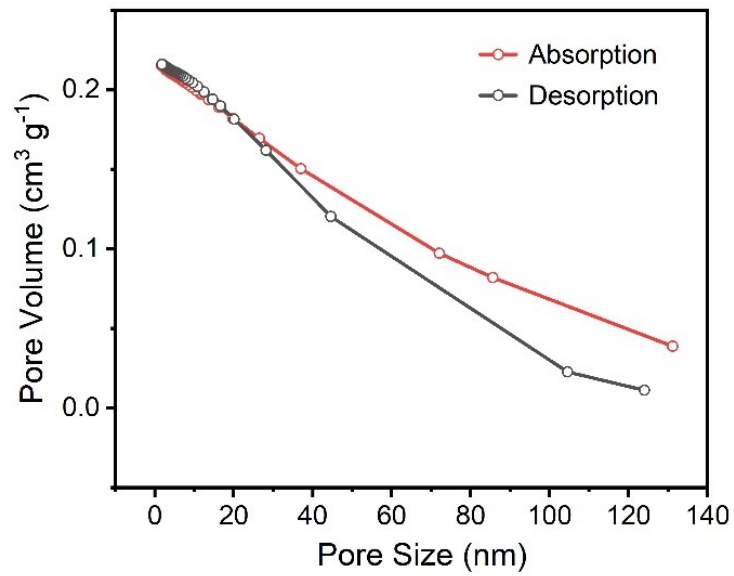

**Figure S1. The BJH pore size distribution curves of MXene@VO<sub>2</sub> composite.**

(a) pure  $\text{VO}_2$

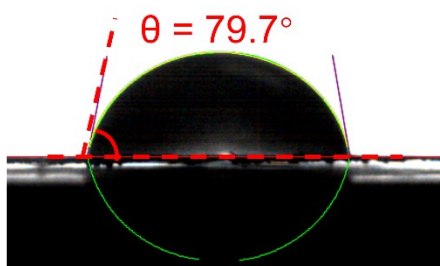

(b) MXene@ $\text{VO}_2$

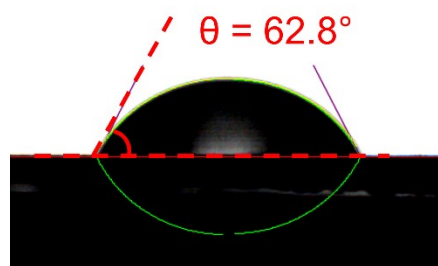

**Figure S2.** The contact angle of pure  $\text{VO}_2$  and MXene@ $\text{VO}_2$  with 2 M ZnOTf electrolyte.

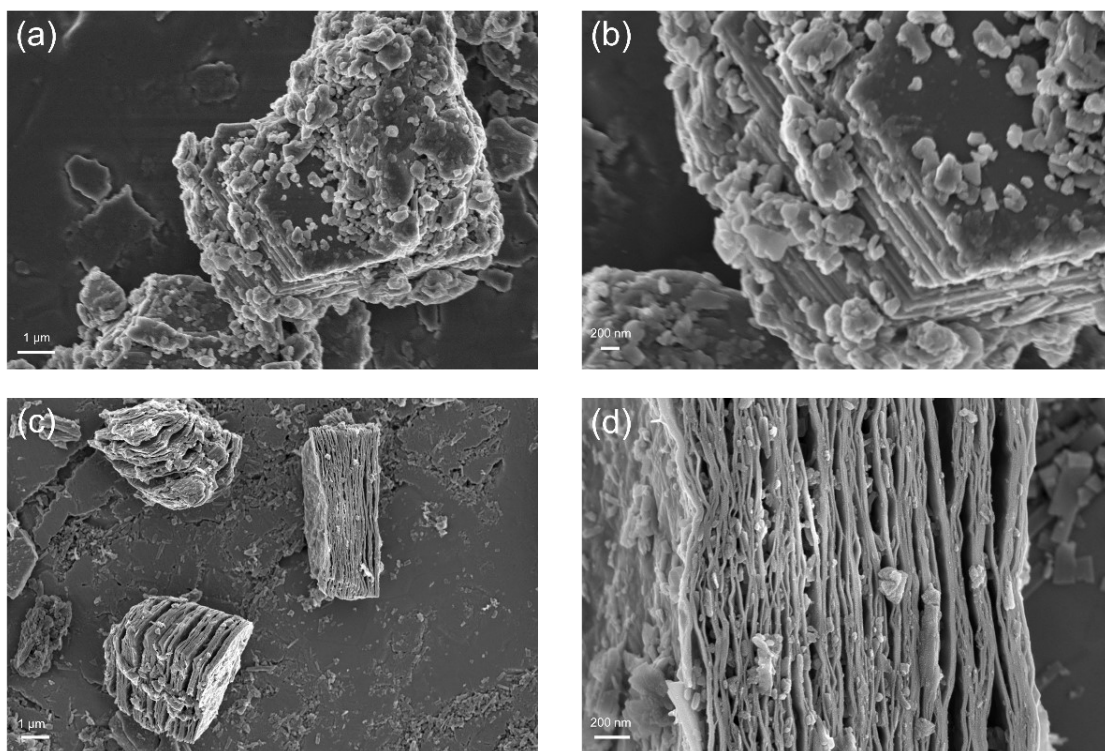

**Figure S3. SEM images of (a,b) MAX and (c,d) m-MXene at different magnifications.**

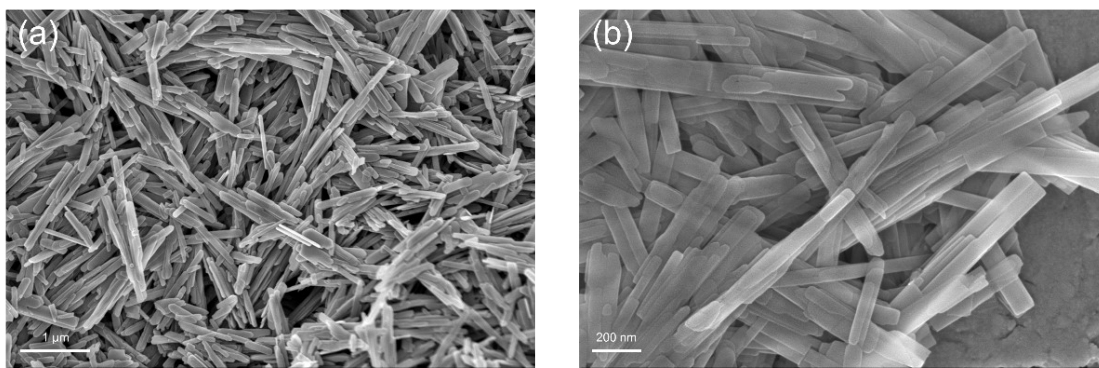

**Figure S4. SEM images of pure  $\text{VO}_2$  at different magnifications.**

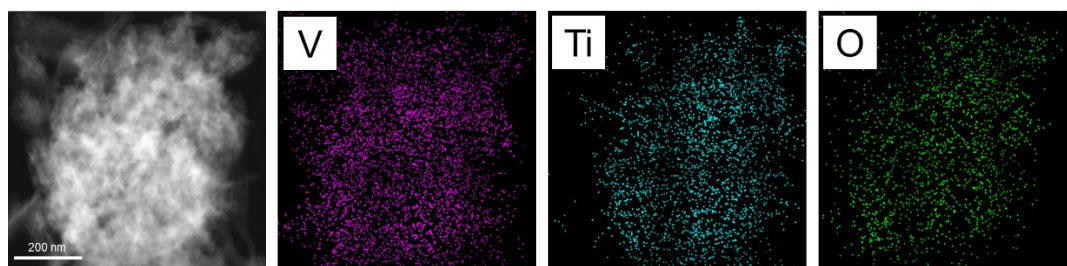

**Figure S5. TEM image of MXene@VO<sub>2</sub> and corresponding EDS mappings of V, Ti, O elements.**



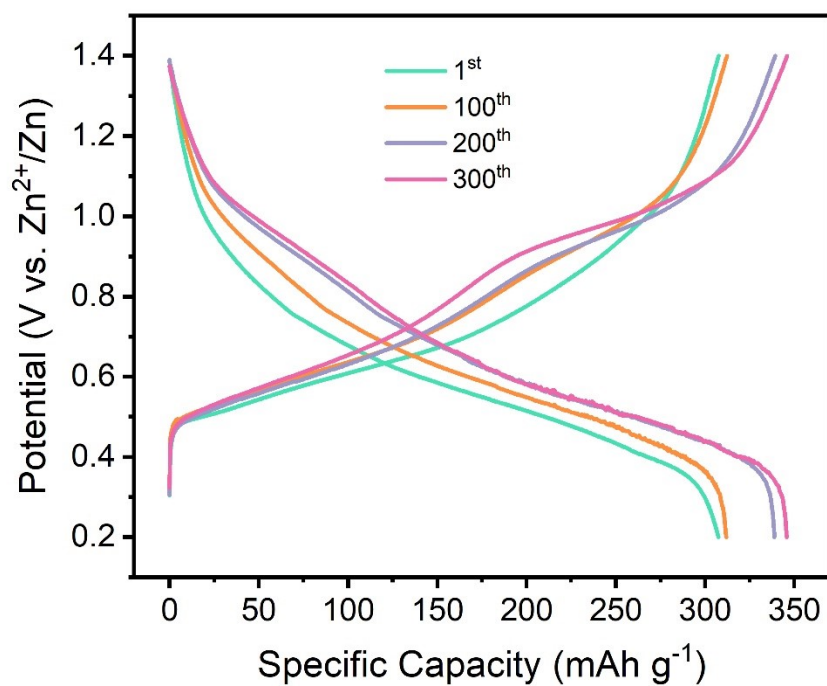

**Figure S6. Galvanostatic charge/discharge curves of the MXene@VO<sub>2</sub> composite at 0.5 C.**

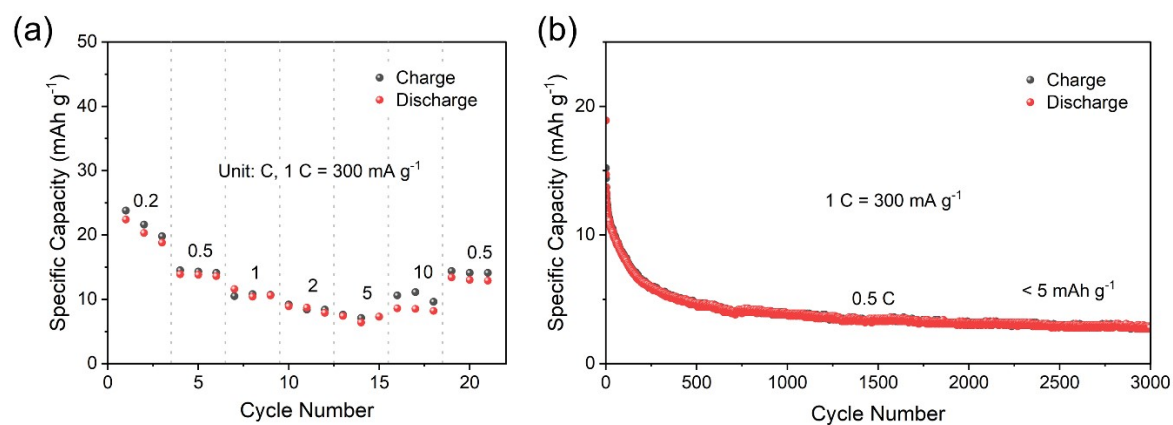

**Figure S7. The rate and cycle performances of MXene.**

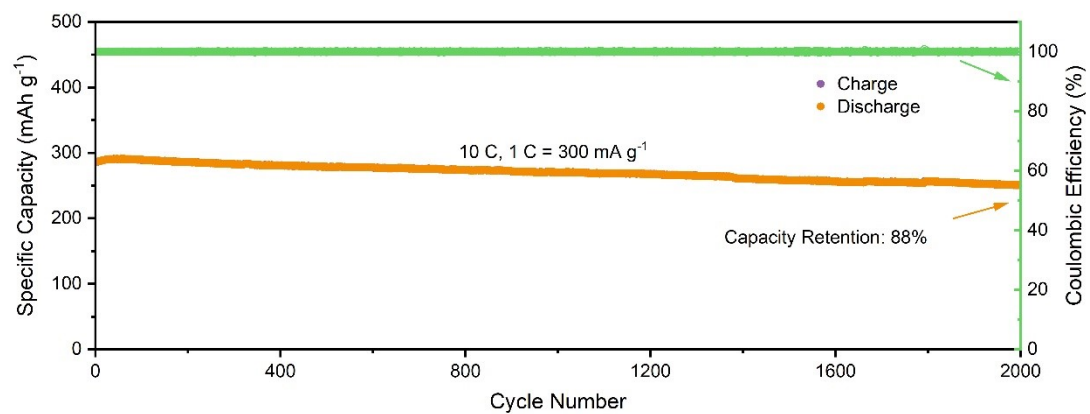

**Figure S8.** The cycle performance of MXene@VO<sub>2</sub> at 10 C.

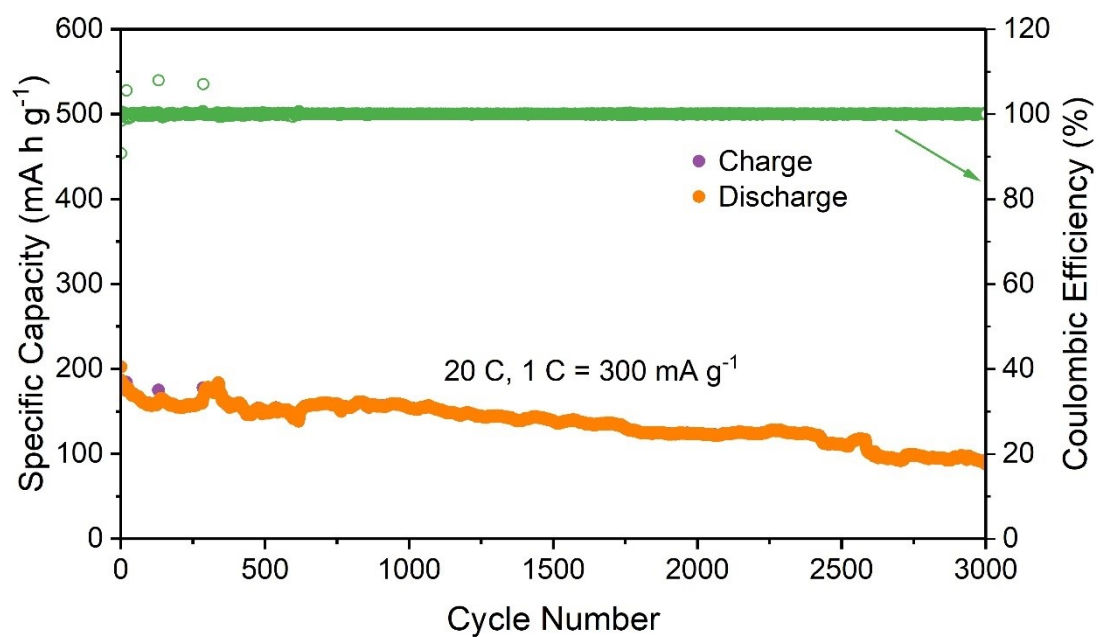

**Figure S9.** The cycle performance of pure  $\text{VO}_2$  at 20 C.

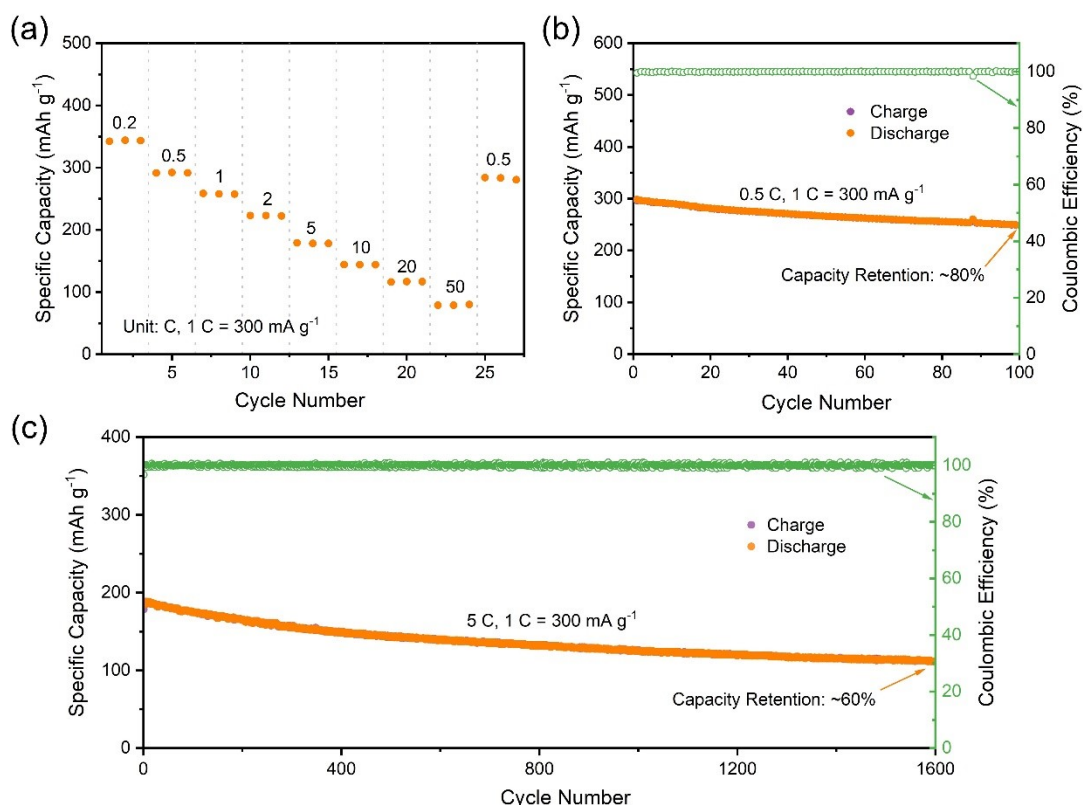

**Figure S10. The electrochemical performance of MXene@VO<sub>2</sub> at -20 °C: (a) The rate performance. (b,c) The cycle performance at (b) 0.5 C and (c) 20 C.**

The low-temperature performance of MXene@VO<sub>2</sub> composite used as the cathode of AZIB was further measured at -20 °C in a low-temperature test chamber. MXene@VO<sub>2</sub> offers a capacity of about 300 mA h g<sup>-1</sup> at 0.5 C, with a capacity retention of 80% over 100 cycles. Figure S9b exhibits the rate performance of MXene@VO<sub>2</sub>, which possesses a capacity of 291.5, 258.6, 223.0, 179.1, 144.2, 116.7 mA h g<sup>-1</sup> at 0.5 C, 1 C, 2 C, 5 C, 10 C and 20 C respectively. The capacities at low rates are close to those at room temperature, demonstrating the superior low-temperature performance of MXene@VO<sub>2</sub>. However, when the rate is adjusted to 50 C, MXene@VO<sub>2</sub> only offers a capacity of 79.9 mA h g<sup>-1</sup>, which can be ascribed to the low ion conductivity at low temperature leading to the slight deterioration of high-rate performance. The long-term cycle performance of MXene@VO<sub>2</sub> at -20 °C can be obtained from Figure S9c, which possesses an initial capacity of about 190 mA h g<sup>-1</sup> at 5 C with a capacity decay of 0.025% per cycle and a coulombic efficiency of about 100% over 1600 cycles.

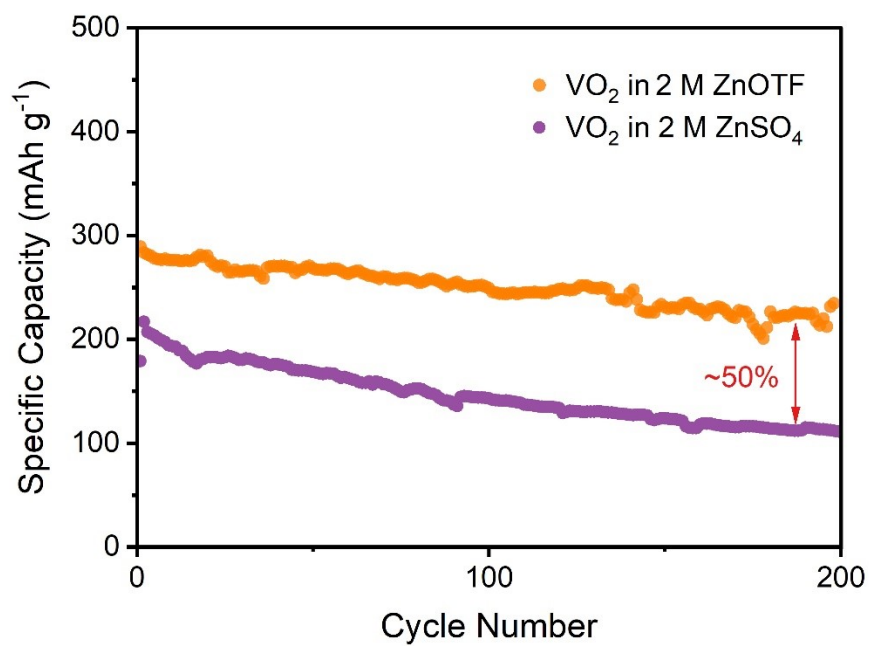

**Figure S11.** The electrochemical performance of MXene@VO<sub>2</sub> in different electrolytes.

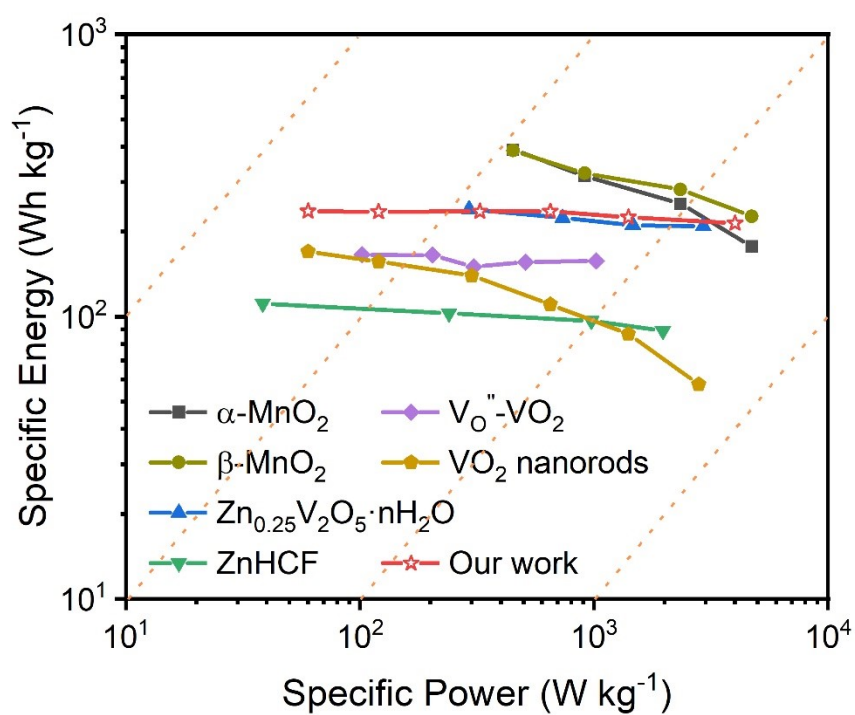

**Figure S12. The Ragone plots of MXene@VO<sub>2</sub> compared with other reported cathodes for AZIBs.**

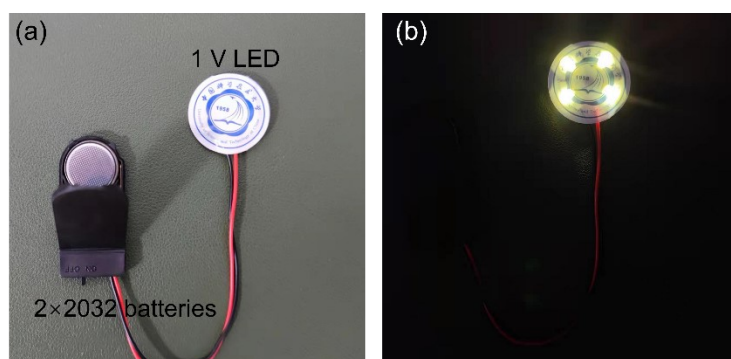

**Figure S13. The photographs of lighting 1V LED bulb using two 2032 cells (MXene@VO<sub>2</sub> as cathode).**



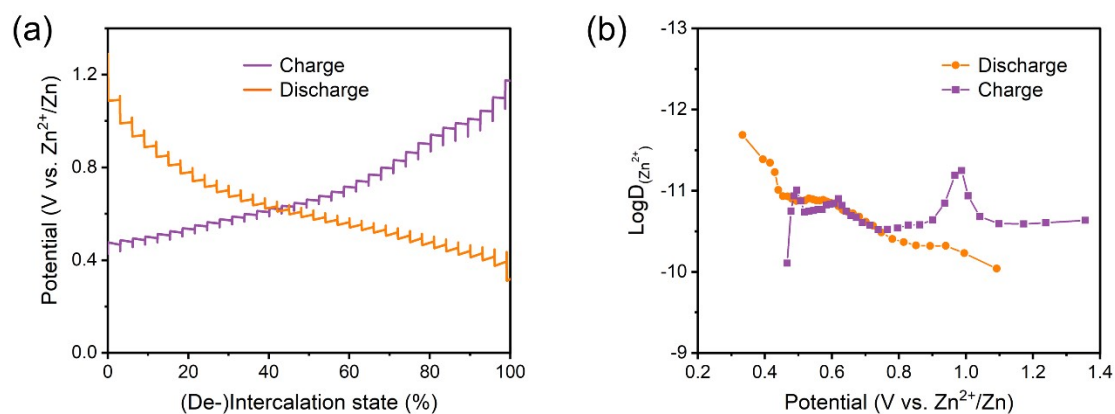

**Figure S14. (a) The galvanostatic charge/discharge curves of GITT test at 0.2 C (work for 10 min and rest for 60 min). (b) The diffusion coefficient of  $\text{Zn}^{2+}$  in the MXene@ $\text{VO}_2$  electrode.**

**Table S1. The comparison of various vanadium dioxide-based materials and their electrochemical performances in AZIBs.**

| Cathode                                                       | Electrolyte/<br>Potential<br>window | Rate performance                                                                                                | Cycling<br>performance<br>(Capacity<br>retention) | Ref.        |
|---------------------------------------------------------------|-------------------------------------|-----------------------------------------------------------------------------------------------------------------|---------------------------------------------------|-------------|
| MXene@VO <sub>2</sub>                                         | 2 M ZnOTf<br>0.2-1.4 V              | 363.6 mA h g <sup>-1</sup> at 0.2 C<br>289.1 mA h g <sup>-1</sup> at 10 C<br>169.1 mA h g <sup>-1</sup> at 50 C | 76% over 5000<br>cycles at 20 C                   | Our<br>work |
| TiC <sub>x</sub> @VO <sub>2</sub>                             | 2 M ZnOTf<br>0.4-1.6 V              | 378.8 mA h g <sup>-1</sup> at 1 A g <sup>-1</sup><br>303.1 mA h g <sup>-1</sup> at 20 A g <sup>-1</sup>         | 82% over 2600<br>cycles at 20 A g <sup>-1</sup>   | 1           |
| VO <sub>2</sub> @MXene<br>film                                | 2 M ZnOTf<br>0.3-1.3 V              | 228.5 mA h g <sup>-1</sup> at 0.2 A g <sup>-1</sup><br>158.3 mA h g <sup>-1</sup> at 2 A g <sup>-1</sup>        | 72.1% over 2500<br>cycles at 5 A g <sup>-1</sup>  | 2           |
| V <sub>2</sub> O <sub>x</sub> @V <sub>2</sub> CT <sub>x</sub> | 1 M ZnSO <sub>4</sub><br>0.3-1.6 V  | 304 mA h g <sup>-1</sup> at 0.05 A g <sup>-1</sup><br>107 mA h g <sup>-1</sup> at 1 A g <sup>-1</sup>           | 81.6% over 200<br>cycles at 1 A g <sup>-1</sup>   | 3           |
| VO <sub>2</sub> nanoflakes                                    | 1 M ZnSO <sub>4</sub><br>0.2-1.0 V  | 289 mA h g <sup>-1</sup> at 0.1 A g <sup>-1</sup><br>156 mA h g <sup>-1</sup> at 2 A g <sup>-1</sup>            | 74% over 2000<br>cycles at 2 A g <sup>-1</sup>    | 4           |
| VO <sub>2</sub> nanorods                                      | 1 M ZnSO <sub>4</sub><br>0.2-1.2 V  | 325.6 mA h g <sup>-1</sup> at 0.05 A g <sup>-1</sup><br>72 mA h g <sup>-1</sup> at 5 A g <sup>-1</sup>          | 86% over 5000<br>cycles at 3 A g <sup>-1</sup>    | 5           |
| VO <sub>2</sub> nanofibers                                    | 3 M ZnOTf<br>0.3-1.4 V              | 357 mA h g <sup>-1</sup> at 0.1 A g <sup>-1</sup><br>171 mA h g <sup>-1</sup> at 52.1 A g <sup>-1</sup>         | 91.2% over 300<br>cycles at 0.2 A g <sup>-1</sup> | 6           |
| VO <sub>2</sub> nanorods                                      | 1 M ZnSO <sub>4</sub><br>0.2-1.3 V  | 384 mA h g <sup>-1</sup> at 0.05 A g <sup>-1</sup><br>272 mA h g <sup>-1</sup> at 3.0 A g <sup>-1</sup>         | 75.7% over 950<br>cycles at 3 A g <sup>-1</sup>   | 7           |
| VO <sup>•+</sup> -VO <sub>2</sub>                             | 3 M ZnOTf<br>0.4-1.5 V              | 375 mA h g <sup>-1</sup> at 0.1 A g <sup>-1</sup><br>220 mA h g <sup>-1</sup> at 5 A g <sup>-1</sup>            | 85% over 2000<br>cycles at 5 A g <sup>-1</sup>    | 8           |
| VO <sub>2</sub> (B)/RGO                                       | 3 M ZnOTf<br>0.2-1.4 V              | 456 mA h g <sup>-1</sup> at 0.1 A g <sup>-1</sup><br>292 mA h g <sup>-1</sup> at 10 A g <sup>-1</sup>           | 90% over 1000<br>cycles 5 A g <sup>-1</sup>       | 9           |

## References

1. W. Kou, L. Yu, Q. Wang, Y. Yang, T. Yang, H. Geng, X. Miao, B. Gao and G. Yang, *J. Power Sources*, 2022, **520**.
2. Z. Shi, Q. Ru, Z. Pan, M. Zheng, F. Chi-Chun Ling and L. Wei, *ChemElectroChem*, 2021, **8**, 1091-1097.
3. R. Venkatkarthick, N. Rodthongkum, X. Zhang, S. Wang, P. Pattananuwat, Y. Zhao, R. Liu and J. Qin, *ACS Applied Energy Materials*, 2020, **3**, 4677-4689.
4. Q. Pang, H. N. Zhao, R. Q. Lian, Q. Fu, Y. J. Wei, A. Sarapulova, J. Q. Sun, C. Z. Wang, G. Chen and H. Ehrenberg, *J. Mater. Chem. A*, 2020, **8**, 9567-9578.
5. L. Chen, Y. Ruan, G. Zhang, Q. Wei, Y. Jiang, T. Xiong, P. He, W. Yang, M. Yan, Q. An and L. Mai, *Chem. Mater.*, 2019, **31**, 699-706.
6. J. Ding, Z. Du, L. Gu, B. Li, L. Wang, S. Wang, Y. Gong and S. Yang, *Adv. Mater.*, 2018, **30**, e1800762.
7. Z. L. Li, S. Ganapathy, Y. L. Xu, Z. Zhou, M. Sarilar and M. Wagemaker, *Adv. Energy Mater.*, 2019, **9**.
8. Z. Li, Y. Ren, L. Mo, C. Liu, K. Hsu, Y. Ding, X. Zhang, X. Li, L. Hu, D. Ji and G. Cao, *ACS Nano*, 2020, **14**, 5581-5589.
9. F. H. Cui, J. Zhao, D. X. Zhang, Y. Z. Fang, F. Hu and K. Zhu, *Chem. Eng. J.*, 2020, **390**.
